# Supplementary material for: Ultrafast synthesis of silicone elastomers using silsesquioxane cages as crosslinkers
Source: Royal Society of Chemistry journal article supplement (doi:10.1039/d2cc06974a), 2023-01-01
Supplement: d2cc06974a1.pdf [file d2cc06974a1.pdf]

## Electronic Supplementary Information (ESI)

### Ultrafast Synthesis of Silicone Elastomers using Silsesquioxane Cages as Crosslinkers

*Chidchanok Wannasiri,<sup>†</sup> Supphachok Chanmungkalakul,<sup>†</sup> Teeraya Bureerug,<sup>†</sup> Mongkol Sukwattanasinitt,<sup>§</sup> and Vuthichai Ervithayasuporn<sup>†\*</sup>*

<sup>†</sup>Department of Chemistry, Center of Excellence for Innovation in Chemistry (PERCH-CIC), and Center for Inorganic and Materials Chemistry, Faculty of Science, Mahidol University, 272 RAMA VI road, Ratchathewi District, Bangkok 10400, Thailand.

<sup>§</sup>Department of Chemistry, Faculty of Science and Nanotec-CU Center of Excellence on Food and Agriculture, Department of Chemistry, Faculty of Science, Chulalongkorn University, Bangkok 10330, Thailand

\*Corresponding Author: V. Ervithayasuporn (V.E.)

Email: [vuthichai.erv@mahidol.edu](mailto:vuthichai.erv@mahidol.edu); [maldiniandg@hotmail.com](mailto:maldiniandg@hotmail.com)

# Electronic Supplementary Information (ESI)

## Table of contents

|                                                                                                                                                | Pages   |
|------------------------------------------------------------------------------------------------------------------------------------------------|---------|
| Chemicals and Instruments                                                                                                                      | S3      |
| Synthesis of cross-linked siloxane/silsesquioxane elastomers (CSSEs)                                                                           | S3      |
| Adsorption experiment                                                                                                                          | S3      |
| Compressive test                                                                                                                               | S4      |
| FTIR spectra of a) OVS, vinyl D <sub>4</sub> and vinyl CSSE at solid state<br>and b) OVS, methyl D <sub>4</sub> and methyl CSSE at solid state | S5      |
| <sup>29</sup> Si and <sup>13</sup> C NMR spectra of OVS in solid state                                                                         | S5      |
| <sup>29</sup> Si and <sup>13</sup> C NMR spectra of methyl CSSE in solid state                                                                 | S6      |
| <sup>29</sup> Si and <sup>13</sup> C NMR spectra of vinyl CSSE in solid state                                                                  | S6      |
| XRD curves of vinyl CSSE (Black) and methyl CSSE (Red) samples                                                                                 | S7      |
| Thermal gravimetric analysis (TGA) of octavinylsilsesquioxane (OVS) under<br>N <sub>2</sub> and O <sub>2</sub> atmosphere                      | S8      |
| Thermal gravimetric analysis (TGA) of methyl CSSE under N <sub>2</sub> and O <sub>2</sub> atmosphere                                           | S9      |
| Thermal gravimetric analysis (TGA) of vinyl CSSE under N <sub>2</sub> and O <sub>2</sub> atmosphere                                            | S10     |
| SEM images of vinyl CSSE                                                                                                                       | S11     |
| Optical images of vinyl CSSE a) without and b) with HMDSO modification                                                                         | S11     |
| Optical images of a) water and b) oil on the surface of methyl CSSE                                                                            | S11     |
| Optical images of methyl CSSE a) before and b) after adsorption process<br>in mixed solvent (water and ether stained with yellow dye)          | S12     |
| Adsorption capacity of methyl CSSE and vinyl CSSE in various solvents                                                                          | S12     |
| Recyclability of methyl CSSE in various solvents                                                                                               | S13     |
| The N <sub>2</sub> adsorption–desorption isotherm of methyl CSSE                                                                               | S13     |
| Table of experiment conditions of CSSEs                                                                                                        | S14-S15 |
| Table of adsorption capacity values of CSSEs in different solvents                                                                             | S16     |
| Table of adsorption capacity values of methyl CSSE in different solvents                                                                       | S17     |
| Table of condition comparison of synthesized elastomer                                                                                         | S18     |

# Electronic Supplementary Information (ESI)

## Chemicals and Instruments

Deionized (DI) water used in this work was obtained from Ultra Clear SIEMENS under ASTM type 2. The commercial grade of solvents (i.e., acetone, DCM) were further distilled. The analytical grade of THF, Toluene, DMF, DMSO and isopropanol were used without purification. Potassium carbonate anhydrous, octamethylcyclotetrasiloxane, hexamethyldisiloxane and 2,4,6,8-tetramethyl-2,4,6,8-tetravinylcyclotetrasiloxane were purchased from Ajax Chemicals and TCI Chemicals. Octavinylsilsesquioxane (OVS) was prepared according to the literature report.<sup>14</sup> The NMR spectra were collected by solid-state nuclear magnetic resonance spectroscopy (Bruker ASCEND 400 MHz WB NMR/ DNP spectrometer). The FT-IR spectra were collected using the attenuated total reflectance (ATR) technique on a Bruker model Alpha spectrometer. SEM images along with elemental analysis were done by FEI Quanta 400 SEM. Thermal gravimetric analysis (TGA) were done by TA Instruments SDT 2690. X-ray diffraction experiment was performed by Bruker D8 Advance diffractometer with monochromatic CuK $\alpha$  radiation ( $\lambda = 0.154\text{nm}$ ., Applied voltage = 40kV, current = 30 mA,  $2\theta = 5.00\text{-}65.00^\circ$  and scan rate =  $5^\circ\text{s}^{-1}$ ). Compressive test of the materials was measured using Universal testing machine (INSTRON 5569) with loading force 1 kN. The compression test was performed by using cylindrical shape of CSSEs and measured at crosshead speed of 12 mm. per min. N<sub>2</sub> adsorption-desorption analysis was performed with a Micromeritics apparatus (ASAP 2060) at 77.38 K. The sample of 0.1774 g of material was degassed at 80 °C for 24 h under vacuum prior to measurements.

## Experiment Section

### Synthesis of cross-linked siloxane/silsesquioxane elastomers (CSSEs)

OVS (3 g, 4.74 mmol), K<sub>2</sub>CO<sub>3</sub> (40 mg, 0.29 mmol) and D<sub>4</sub> (octamethylcyclotetrasiloxane or 2,4,6,8-tetramethyl-2,4,6,8-tetravinylcyclotetrasiloxane 7 mL, 20 mmol) were dissolved in DMF solvent (14 mL). Thereafter, the reaction was subsequently stirred and heated at 70°C for 10 min. Then, cloudy solution was observed. After that, it was aged for 2 min. The white solid product was obtained. The products (7.92 g of methyl CSSE and 6.30 g of vinyl CSSE) were washed with DCM and DI to remove the excess of reagents and base. Afterward, the water exchange process was done by immersed in isopropanol for overnight. Samples were soaked in HMDSO (50 mL, 10%v/v) at 40°C for 12 h. After the surface modification, wet samples were freeze-dried to remove solvent. Finally, methyl CSSE (8.05 g) and vinyl CSSE (7.97 g) were obtained after the treatment of HMDSO.

### Absorption experiment

In absorption experiment, 2 mL of various solvents (water, DMF, MeOH, EtOH, THF, DCM, toluene and hexane) were mixed with 50 mg of product in vial. The vial was placed at room temperature for 1 h. The degree of swelling was calculated by the following equation.

Degree of swelling =  $\frac{(W - W_0)}{W_0}$ , where W is the weight of the swollen gel and W<sub>0</sub> is the weight of dry gel.

## Electronic Supplementary Information (ESI)

### Compressive test

In uniaxial compression tests, cylindrical CSSEs with a 3 mm diameter and 10 mm height was used. The experiment performed with loading force 1 kN. The speed of test as 12 mm/min. The %strain of CSSE was calculate by the following equation.

$\%strain = \frac{\Delta L}{L} \times 100$ , where  $\Delta L$  is the change in length and L is original length.

The stress of CSSE was given by the equation as below

$Stress = \frac{F}{A}$ , where F is loading force (N) and A is cross-section area of material ( $m^2$ ).

## Electronic Supplementary Information (ESI)

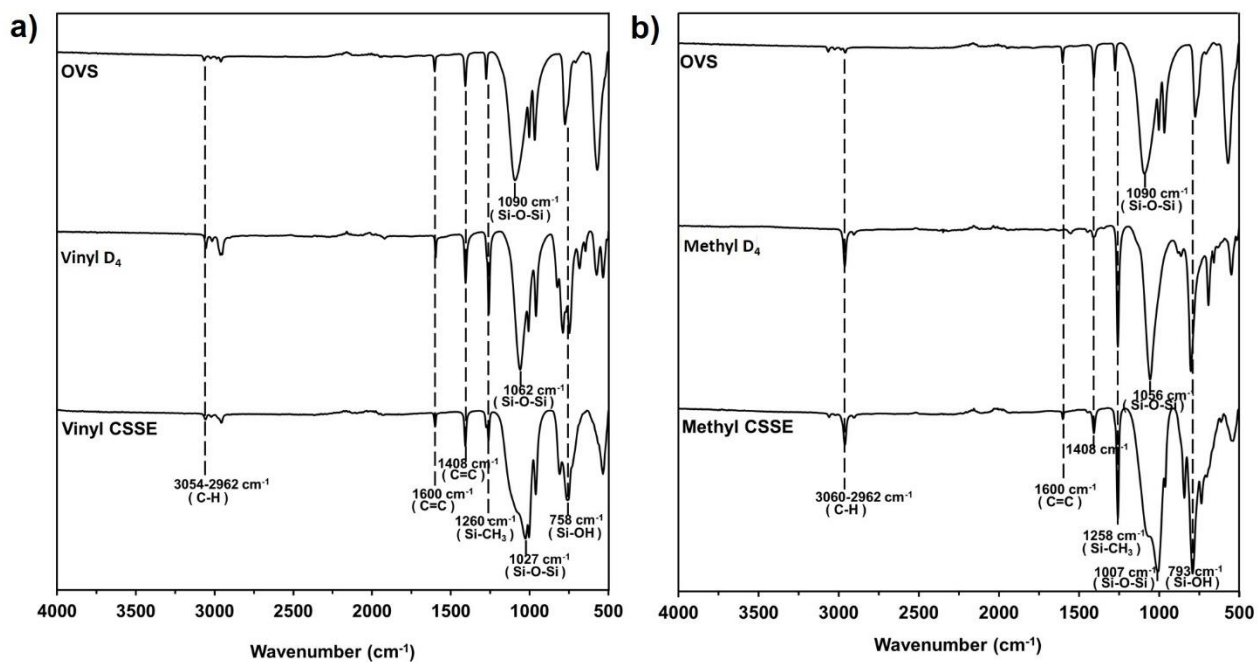

**Fig. S1** FTIR spectra of a) OVS, vinyl D<sub>4</sub> and vinyl CSSE at solid-state and b) OVS, methyl D<sub>4</sub> and methyl CSSE at solid state

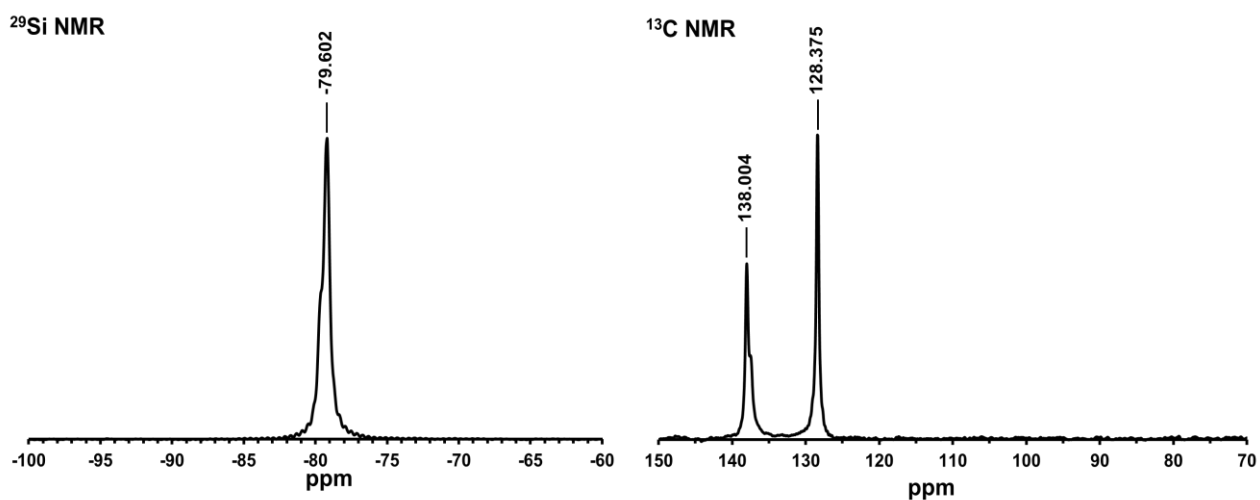

**Fig. S2** <sup>29</sup>Si and <sup>13</sup>C NMR spectra of OVS in solid state

## Electronic Supplementary Information (ESI)

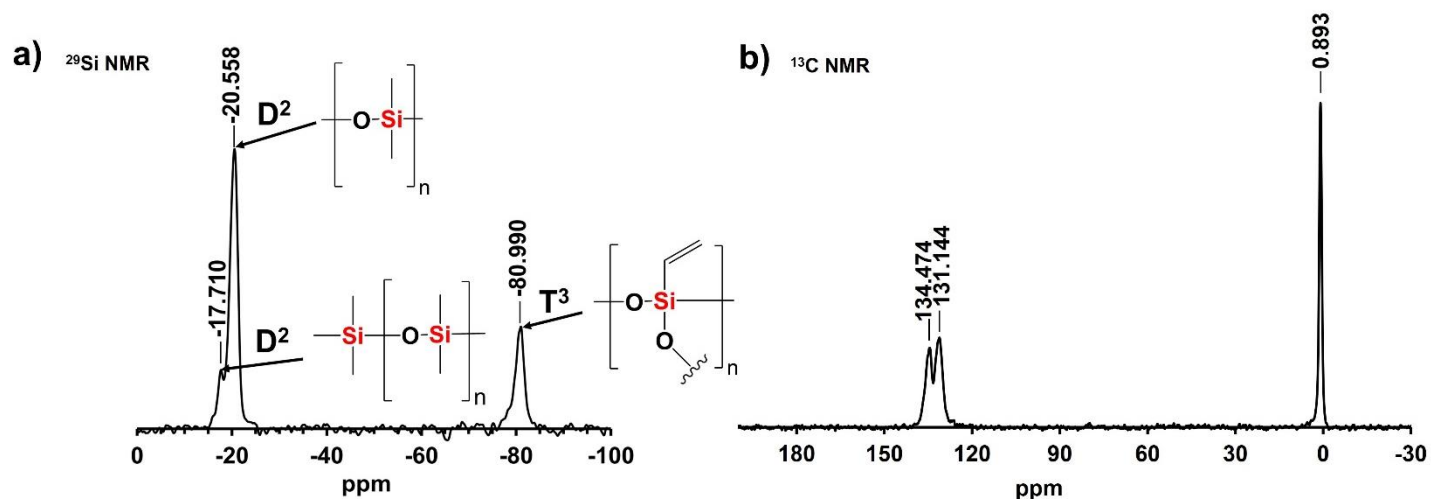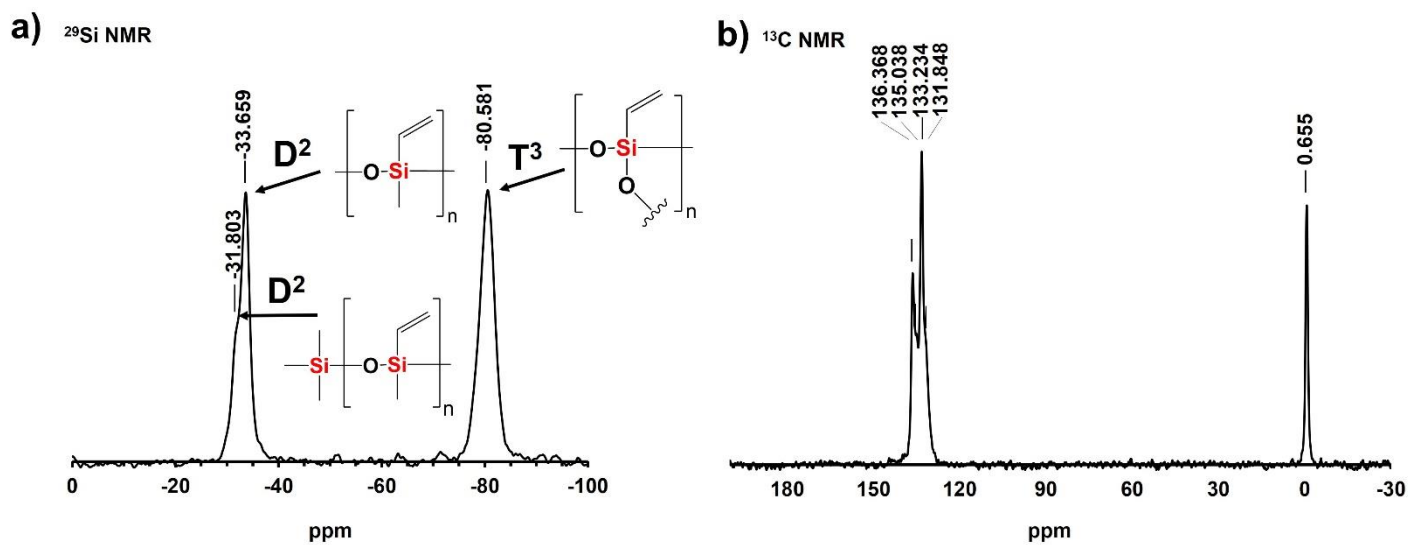

## Electronic Supplementary Information (ESI)

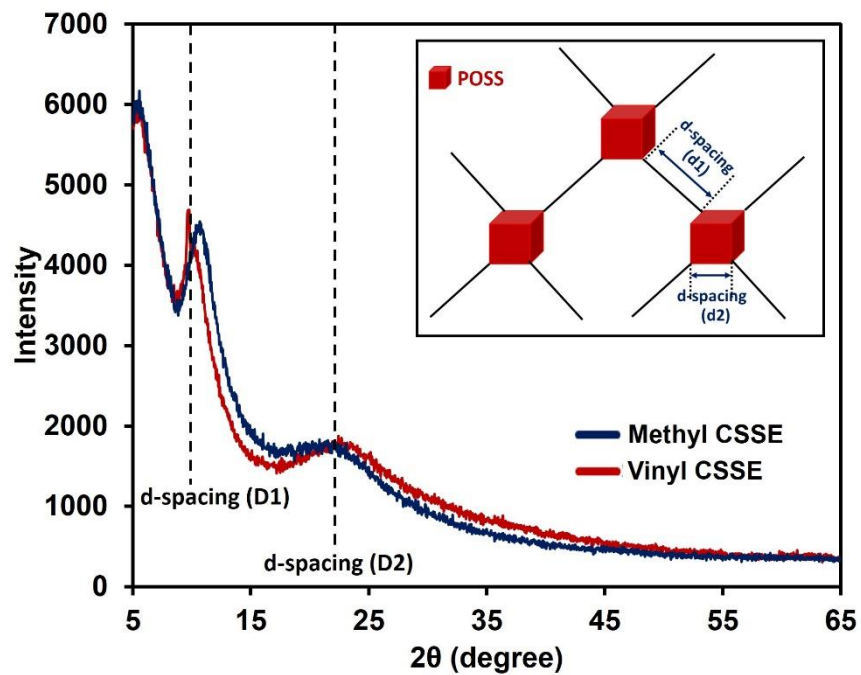

**Fig. S5** XRD curves of vinyl CSSE (Black) and methyl CSSE (Red) samples

## Electronic Supplementary Information (ESI)

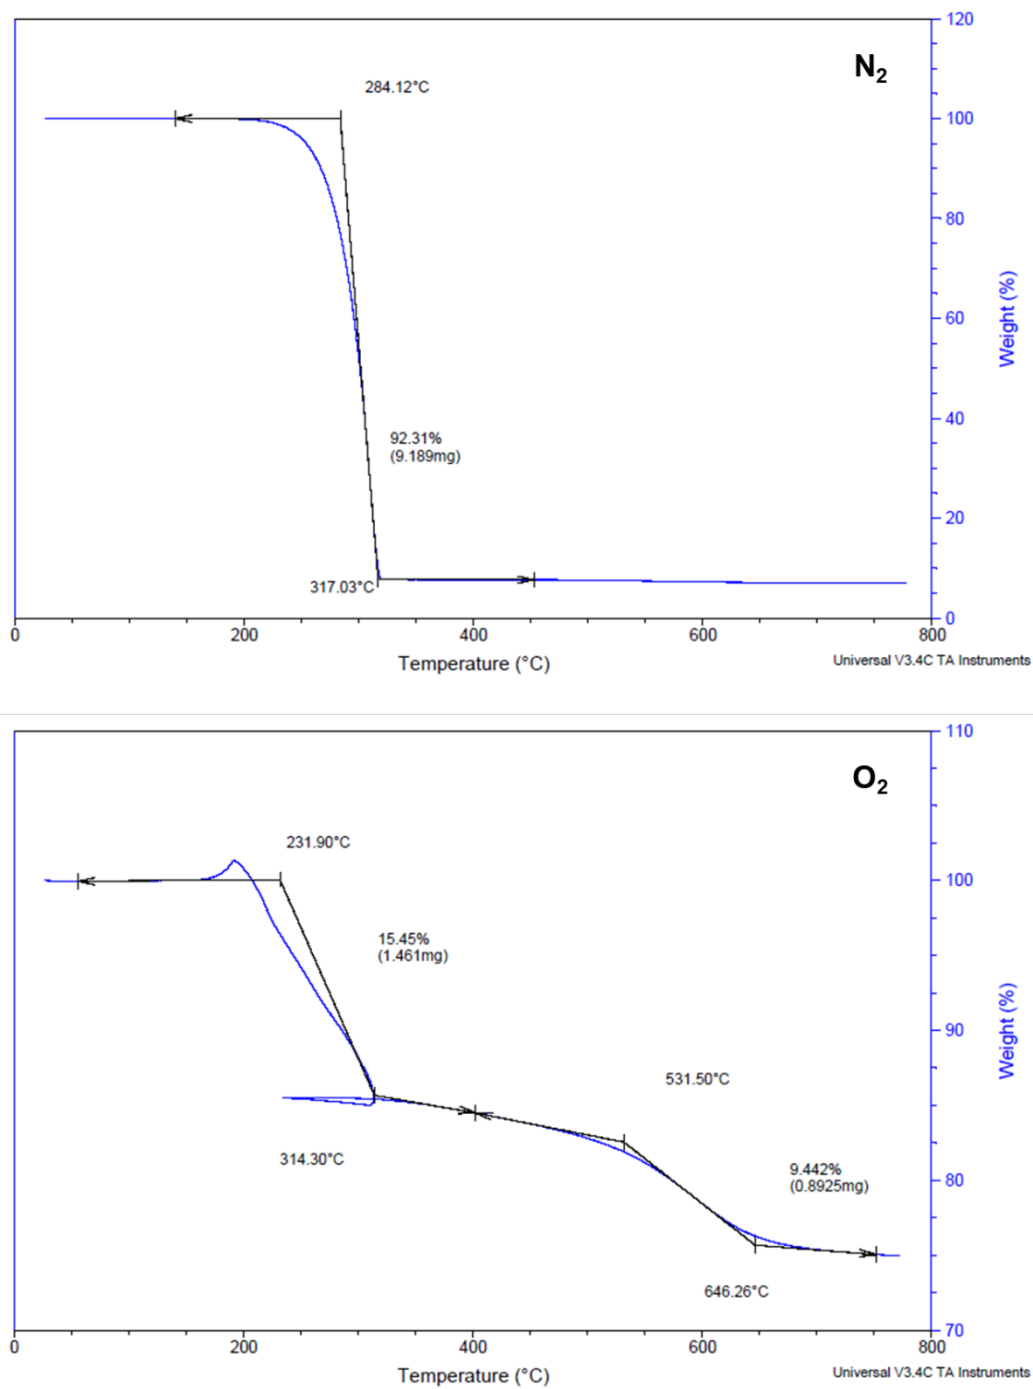

**Fig. S6** Thermal gravimetric analysis (TGA) of octavinylsilsesquioxane (OVS) under N<sub>2</sub> and O<sub>2</sub> atmosphere



## Electronic Supplementary Information (ESI)

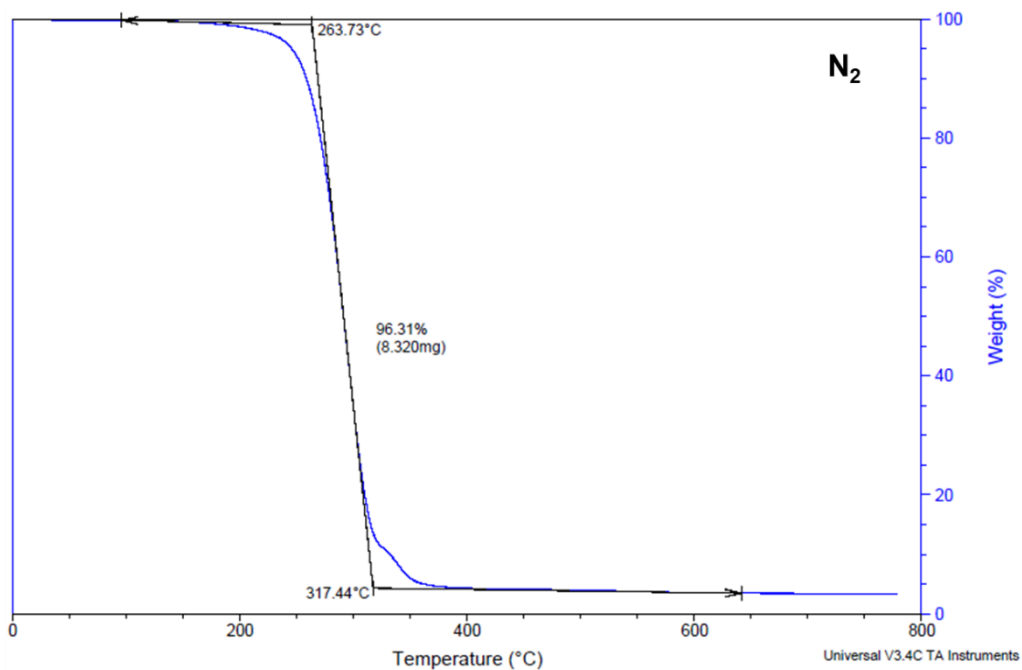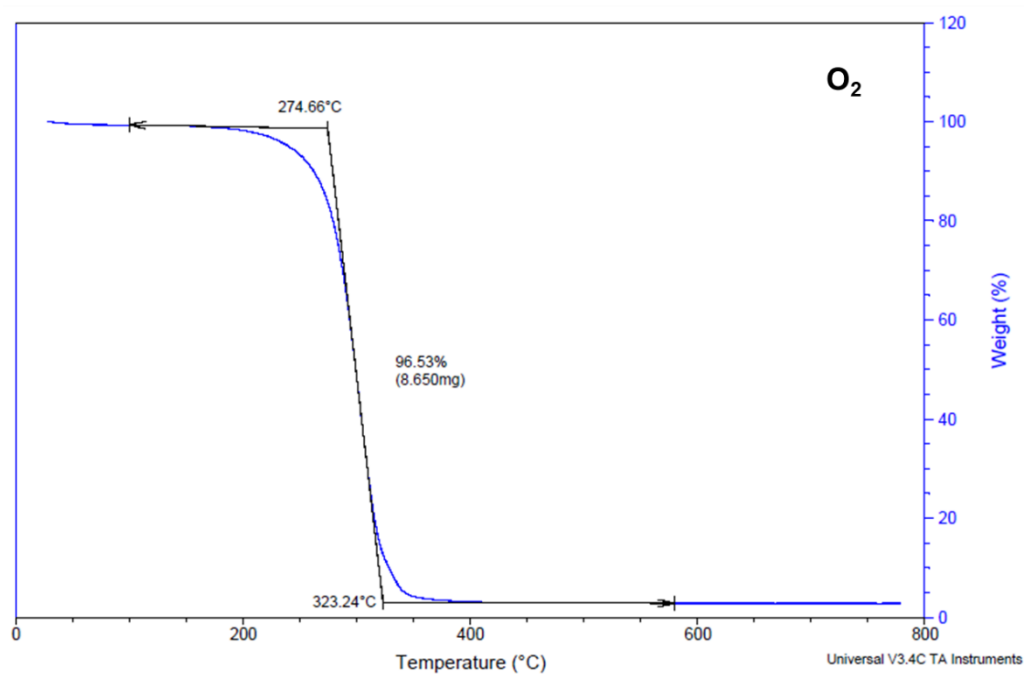

**Fig. S7** Thermal gravimetric analysis (TGA) of methyl CSSE under  $N_2$  and  $O_2$  atmosphere

## Electronic Supplementary Information (ESI)

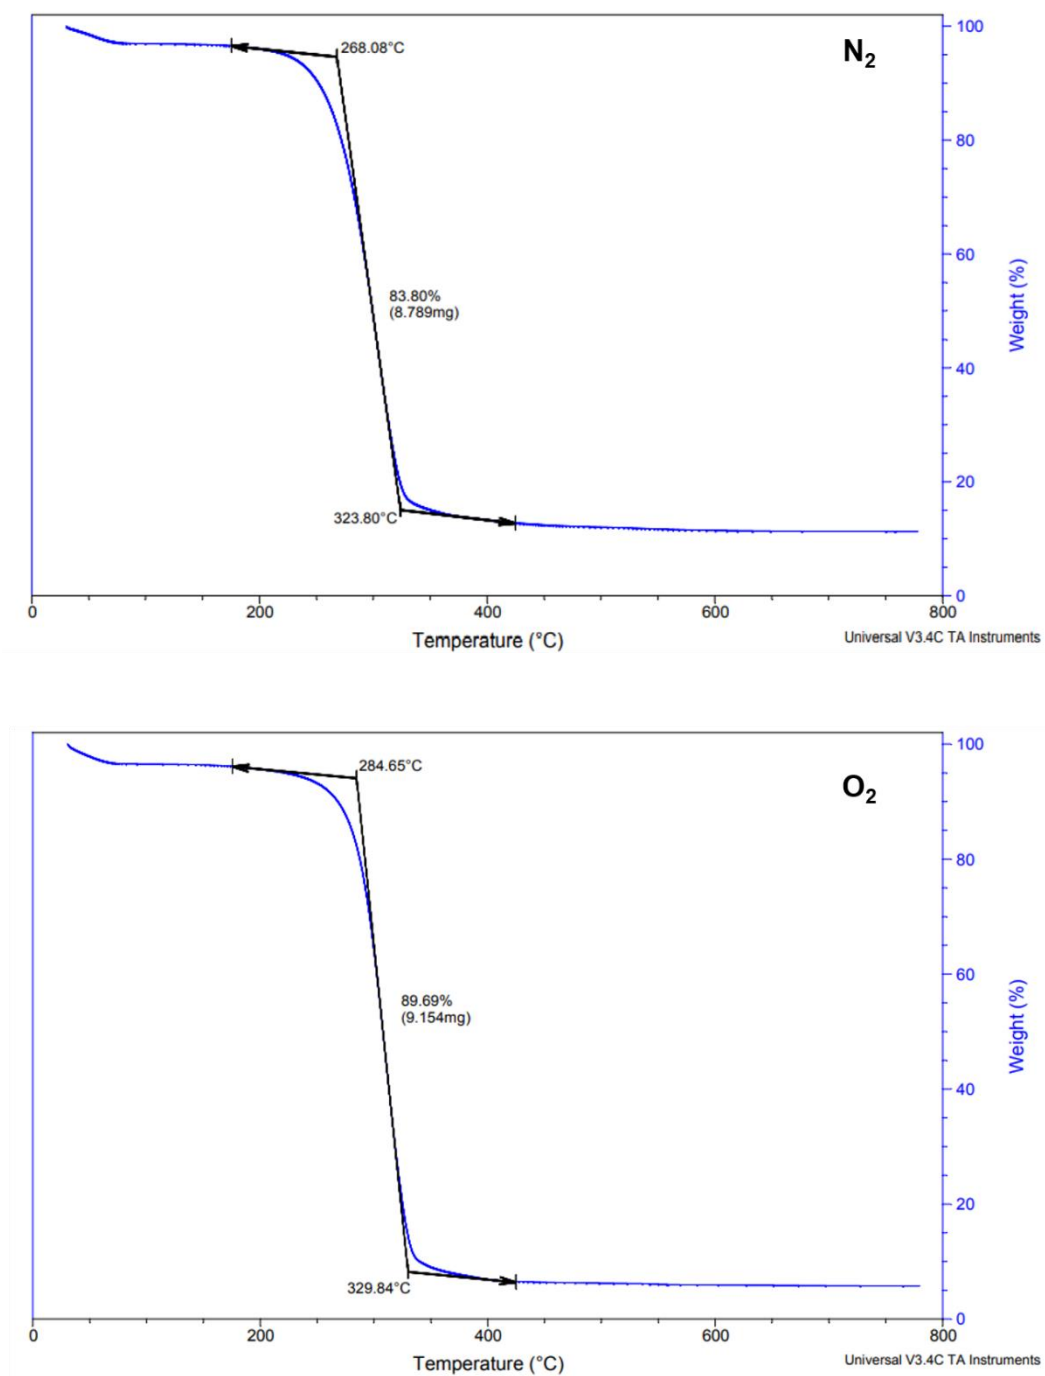

**Fig. S8** Thermal gravimetric analysis (TGA) of vinyl CSSE under  $N_2$  and  $O_2$  atmosphere

## Electronic Supplementary Information (ESI)

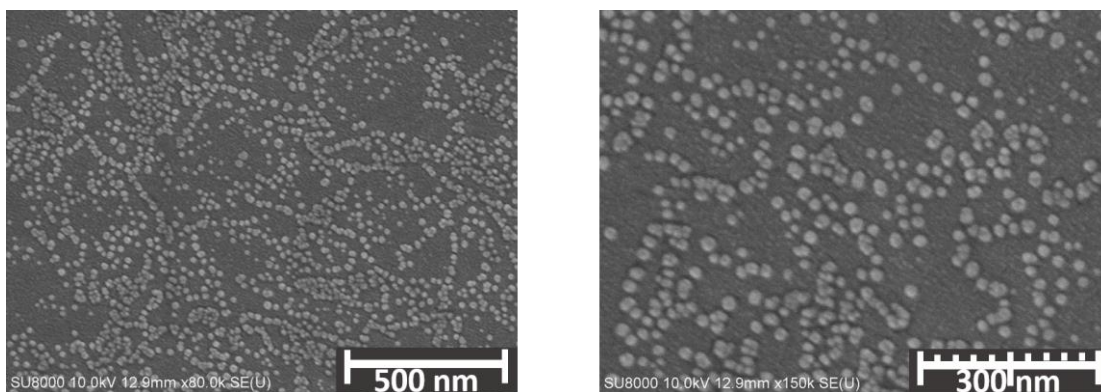

**Fig. S9** SEM images of vinyl CSSE

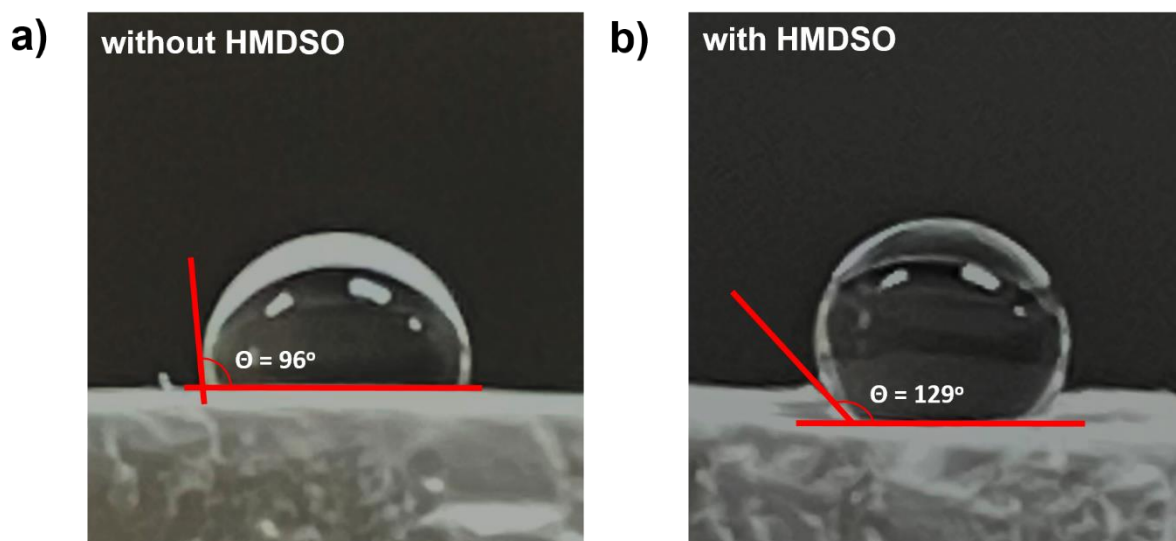

**Fig. S10** Optical images of vinyl CSSE a) without and b) with HMDSO modification

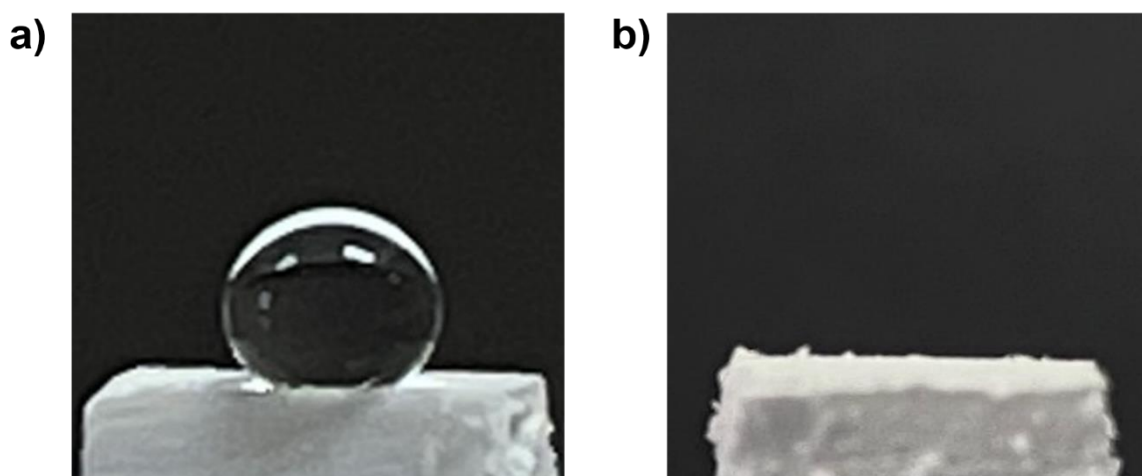

**Fig. S11** Optical images of a) water and b) oil on the surface of methyl CSSE

## Electronic Supplementary Information (ESI)

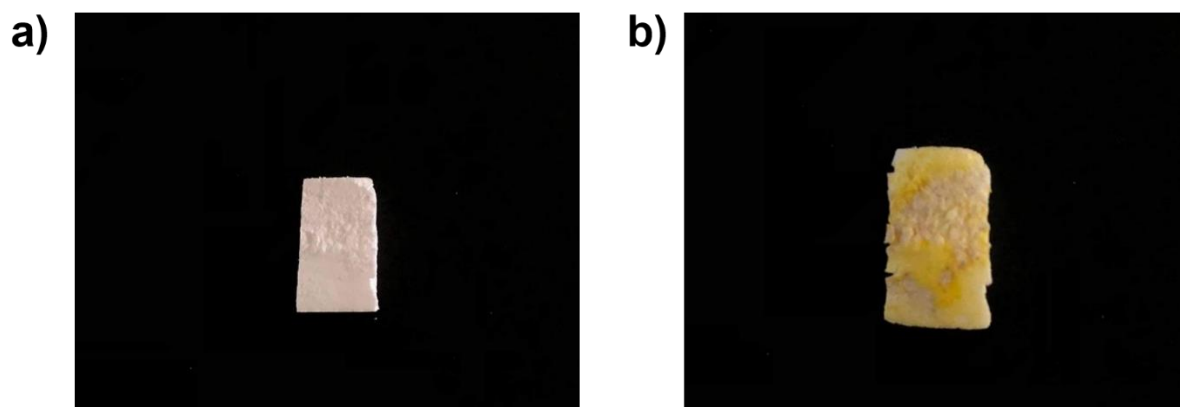

**Fig. S12** Optical images of methyl CSSE a) before and b) after adsorption process in mixed solvent (water and ether stained with yellow dye)

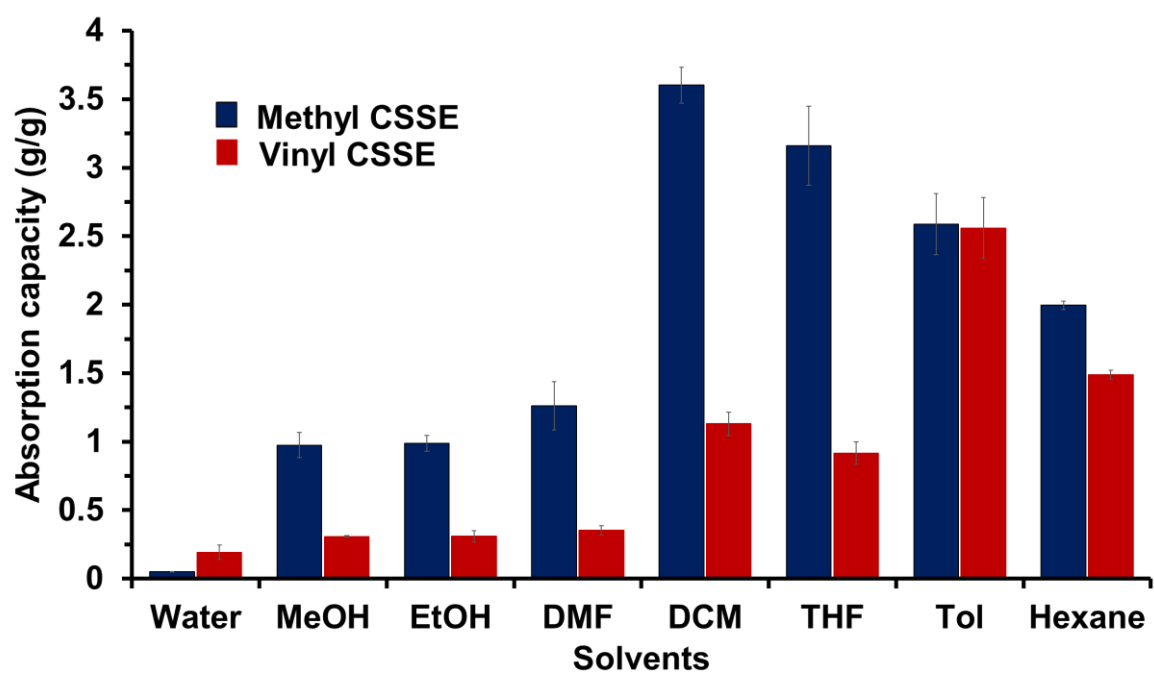

**Fig. S13** Adsorption capacity of methyl CSSE and vinyl CSSE in various solvents

## Electronic Supplementary Information (ESI)

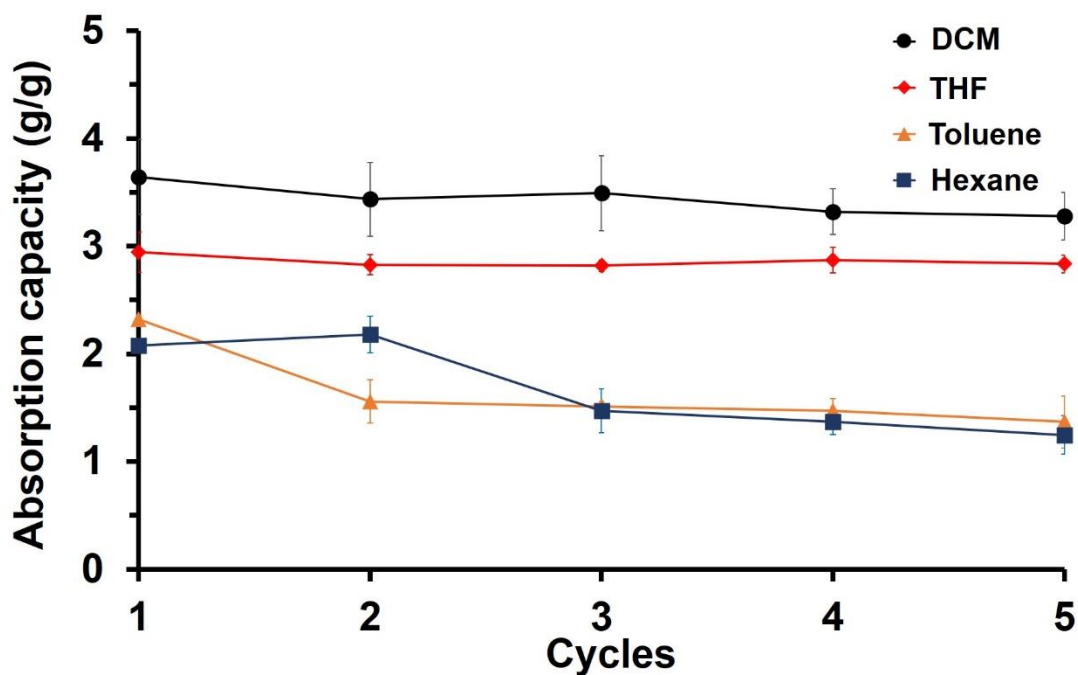

Fig. S14 Recyclability of methyl CSSE in various solvents

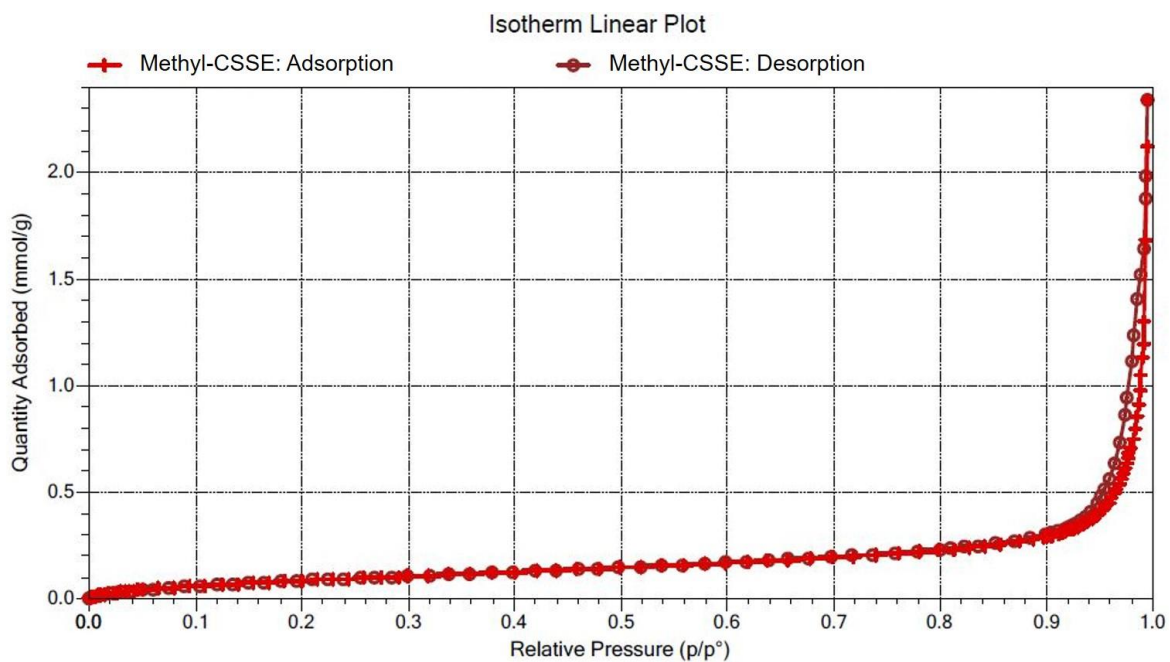

Fig. S15 The  $N_2$  adsorption-desorption of methyl CSSE at 77 K

## Electronic Supplementary Information (ESI)

**Table S1** Experiment conditions of CSSEs with varying POSS reactants.

| Reactants              |                               | Conditions                             |           |                  |             | Results           |
|------------------------|-------------------------------|----------------------------------------|-----------|------------------|-------------|-------------------|
| POSS                   | D <sub>4</sub>                | Catalyst                               | Solvent   | Temperature (°C) | Time (mins) |                   |
| T <sub>8</sub> (0.2g)  | -                             | K <sub>2</sub> CO <sub>3</sub> (15 mg) | DMF (1mL) | 60               | 300         | Brittle solid gel |
| T <sub>10</sub> (0.2g) | -                             | K <sub>2</sub> CO <sub>3</sub> (15 mg) | DMF (1mL) | 60               | 1440        | N/A               |
| T <sub>12</sub> (0.2g) | -                             | K <sub>2</sub> CO <sub>3</sub> (15 mg) | DMF (1mL) | 60               | 1440        | N/A               |
| -                      | Vinyl D <sub>4</sub> (0.2mL)  | K <sub>2</sub> CO <sub>3</sub> (15 mg) | DMF (1mL) | 60               | 300         | Liq. gel          |
| T <sub>8</sub> (0.2g)  | Vinyl D <sub>4</sub> (0.2mL)  | K <sub>2</sub> CO <sub>3</sub> (15 mg) | DMF (1mL) | 60               | 45          | Solid gel (+)     |
| T <sub>8</sub> (0.2g)  | Methyl D <sub>4</sub> (0.2mL) | K <sub>2</sub> CO <sub>3</sub> (15 mg) | DMF (1mL) | 60               | 45          | Solid gel (+)     |

N/A No reaction occurred.

(+) Elasticity rating

**Table S2** Experiment conditions of CSSEs with varying volumes of D<sub>4</sub> and DMF.

| Reactants             |                                | Conditions                             |              |                  |             | Results         |
|-----------------------|--------------------------------|----------------------------------------|--------------|------------------|-------------|-----------------|
| POSS                  | D <sub>4</sub>                 | Catalyst                               | Solvent      | Temperature (°C) | Time (mins) |                 |
| T <sub>8</sub> (0.2g) | Methyl D <sub>4</sub> (0.2mL)  | K <sub>2</sub> CO <sub>3</sub> (15 mg) | DMF (1mL)    | 60               | 45          | Solid gel(+)    |
| T <sub>8</sub> (0.2g) | Methyl D <sub>4</sub> (0.4mL)  | K <sub>2</sub> CO <sub>3</sub> (15 mg) | DMF (1mL)    | 60               | 45          | Solid gel (++)  |
| T <sub>8</sub> (0.2g) | Methyl D <sub>4</sub> (0.5mL)  | K <sub>2</sub> CO <sub>3</sub> (15 mg) | DMF (1mL)    | 60               | 45          | Solid gel (+++) |
| T <sub>8</sub> (0.2g) | Methyl D <sub>4</sub> (1 mL)   | K <sub>2</sub> CO <sub>3</sub> (15 mg) | DMF (1mL)    | 60               | 150         | Solid gel (+++) |
| T <sub>8</sub> (0.2g) | Methyl D <sub>4</sub> (0.5 mL) | K <sub>2</sub> CO <sub>3</sub> (15 mg) | DMF (0.5 mL) | 60               | 20          | Solid gel (+++) |
| T <sub>8</sub> (0.2g) | Methyl D <sub>4</sub> (0.5 mL) | K <sub>2</sub> CO <sub>3</sub> (15 mg) | THF (0.5 mL) | 60               | 300         | N/A             |

N/A No reaction occurred.

(+) Elasticity rating

## Electronic Supplementary Information (ESI)

**Table S3** Experiment conditions of CSSEs with varying types of catalyst.

| Reactants             |                                | Conditions                              |              |                  |             | Results         |
|-----------------------|--------------------------------|-----------------------------------------|--------------|------------------|-------------|-----------------|
| POSS                  | D <sub>4</sub>                 | Catalyst                                | Solvent      | Temperature (°C) | Time (mins) |                 |
| T <sub>8</sub> (0.2g) | Methyl D <sub>4</sub> (0.5 mL) | K <sub>2</sub> CO <sub>3</sub> (15 mg)  | DMF (0.5 mL) | 60               | 20          | Solid gel (+++) |
| T <sub>8</sub> (0.2g) | Methyl D <sub>4</sub> (0.5 mL) | Na <sub>2</sub> CO <sub>3</sub> (15 mg) | DMF (0.5 mL) | 60               | 300         | N/A             |
| T <sub>8</sub> (0.2g) | Methyl D <sub>4</sub> (0.5 mL) | KOH (15 mg)                             | DMF (0.5 mL) | 60               | 300         | N/A             |
| T <sub>8</sub> (0.2g) | Methyl D <sub>4</sub> (0.5 mL) | LiOH(15 mg)                             | DMF (0.5 mL) | 60               | 300         | N/A             |
| T <sub>8</sub> (0.2g) | Methyl D <sub>4</sub> (0.5 mL) | NaOH(15 mg)                             | DMF (0.5 mL) | 60               | 300         | N/A             |

N/A No reaction occurred.

(+) Elasticity rating

**Table S4** Experiment conditions of CSSEs after upscale of reaction.

| Reactants            |                                | Conditions                             |              |                  |             | Results         |
|----------------------|--------------------------------|----------------------------------------|--------------|------------------|-------------|-----------------|
| POSS                 | D <sub>4</sub>                 | Catalyst                               | Solvent      | Temperature (°C) | Time (mins) |                 |
| T <sub>8</sub> (3 g) | Methyl D <sub>4</sub> (7.5 mL) | K <sub>2</sub> CO <sub>3</sub> (15 mg) | DMF (7.5 mL) | 60               | 300         | Solid gel (+++) |
| T <sub>8</sub> (3 g) | Methyl D <sub>4</sub> (7.5 mL) | K <sub>2</sub> CO <sub>3</sub> (50 mg) | DMF (7.5 mL) | 60               | 60          | Solid gel (+++) |
| T <sub>8</sub> (3 g) | Methyl D <sub>4</sub> (7.5 mL) | K <sub>2</sub> CO <sub>3</sub> (50 mg) | DMF (7mL)    | Room temperature | 1440        | N/A             |
| T <sub>8</sub> (3 g) | Methyl D <sub>4</sub> (7.5 mL) | K <sub>2</sub> CO <sub>3</sub> (50 mg) | DMF (7mL)    | 60               | 45          | Solid gel (+++) |
| T <sub>8</sub> (3 g) | Methyl D <sub>4</sub> (7.5 mL) | K <sub>2</sub> CO <sub>3</sub> (50 mg) | DMF (7mL)    | 75               | 15          | Solid gel (+++) |

N/A No reaction occurred.

(+) Elasticity rating

## Electronic Supplementary Information (ESI)

**Table S5** Adsorption capacity values of CSSEs in different solvents

| <b>Solvents</b> | <b>Methyl CSSE</b> |           | <b>Vinyl CSSE</b> |           |
|-----------------|--------------------|-----------|-------------------|-----------|
|                 | <b>Average</b>     | <b>SD</b> | <b>Average</b>    | <b>SD</b> |
| <b>Water</b>    | 0.051              | 0.00157   | 0.193             | 0.05178   |
| <b>MeOH</b>     | 0.975              | 0.09305   | 0.309             | 0.00654   |
| <b>EtOH</b>     | 0.987              | 0.05728   | 0.310             | 0.04057   |
| <b>DMF</b>      | 1.261              | 0.17668   | 0.352             | 0.03430   |
| <b>DCM</b>      | 3.603              | 0.13229   | 1.131             | 0.08411   |
| <b>THF</b>      | 3.160              | 0.28766   | 0.917             | 0.08187   |
| <b>Tol</b>      | 2.588              | 0.22384   | 2.560             | 0.22340   |
| <b>Hexane</b>   | 1.996              | 0.02987   | 1.847             | 0.03257   |



## Electronic Supplementary Information (ESI)

**Table S6** Adsorption capacity values of methyl CSSE in different solvents

| Cycles   | DCM     |         | THF     |         | Tol     |         | Hexane  |         |
|----------|---------|---------|---------|---------|---------|---------|---------|---------|
|          | Average | SD      | Average | SD      | Average | SD      | Average | SD      |
| <b>1</b> | 3.642   | 0.34782 | 2.944   | 0.18820 | 2.319   | 0.04478 | 2.075   | 0.03459 |
| <b>2</b> | 3.435   | 0.34134 | 2.828   | 0.09194 | 1.559   | 0.17027 | 2.179   | 0.20115 |
| <b>3</b> | 3.493   | 0.34816 | 2.818   | 0.05428 | 1.513   | 0.20329 | 1.471   | 0.04228 |
| <b>4</b> | 3.321   | 0.21226 | 2.871   | 0.11936 | 1.474   | 0.11815 | 1.371   | 0.11212 |
| <b>5</b> | 3.280   | 0.22064 | 2.834   | 0.08447 | 1.367   | 0.17768 | 1.247   | 0.24221 |

## Electronic Supplementary Information (ESI)

**Table S7** The condition comparison of synthesized elastomer

| Elastomers                                                                                                    | Reactions                                                                             | Conditions                                                                                         | Ref.     |
|---------------------------------------------------------------------------------------------------------------|---------------------------------------------------------------------------------------|----------------------------------------------------------------------------------------------------|----------|
| UHMW-PDMS-based elastomer                                                                                     | Crosslinking polydimethylsiloxane- $\alpha,\omega$ -diols                             | TMAH catalyst, Toluene, 48 h at room temperature                                                   | 1.       |
| Multifunctional silicone elastomer                                                                            | Ring-opening copolymerization of D <sub>4</sub> and Dual-D <sub>4</sub> <sup>Vi</sup> | Trific acid 0.3%, 10 h at 45 °C                                                                    | 2.       |
| Epoxidized Natural Rubber                                                                                     | ENR/AT-PDMS curing reaction                                                           | Hydroquinone, 60 °C for 10 min with a rotor speed of 60 rpm using a laboratory-sized two-roll mill | 3.       |
| Thermoplastic elastomer of poly(styrene- <i>b</i> -(ethylene- <i>co</i> -butylene)- <i>b</i> -styrene) (SEBS) | Click coupling reaction                                                               | CuI catalyst, DMF, 24 h at room temperature under N <sub>2</sub> atmosphere                        | 4.       |
| PUrea-DDSQ                                                                                                    | polycondensation of diamines                                                          | NaH, DMF, 24 h, heating the mixture up to 180 °C under CO <sub>2</sub> atmosphere                  | 5.       |
| Poly(acrylate amide) Elastomers                                                                               | Reversible addition-fragmentation chain transfer (RAFT) polymerizations               | DMF, 72 h at 80 °C                                                                                 | 6.       |
| Cross-linked siloxane/silsesquioxane-based elastomer                                                          | Anionic ring-opening polymerization                                                   | K <sub>2</sub> CO <sub>3</sub> , DMF, 15 min at 70°C                                               | Our work |

### Ref.

1. C.Tugui, V.Tiron, M.Dascalu, L.Sacarescu and M.Cazacu, *European Polymer Journal*, 2019, **120**, 109243.
2. W.Su, H.Zhang, S.Yang, Y.Xu, C.Zhang, X.Cheng and C.Zhou, *European Polymer Journal*, 2022, **175**, 111382.
3. S.S.Banerjee, S.Banerjee, S.Wießner, A.Janke, G.Heinrich and A.Das, *Macromolecular Materials and Engineering*, 2021, **306**, 2100380.
4. M.Niu, R.Xu, P.Dai and Y.Wu, *Polymer*, 2013, **54**, 2658-2667.
5. B.Zhao, H.Mei, H.Wang, L.Li and S.Zheng, *ACS Applied Polymer Materials*, 2022, **4**, 509-520.
6. S.Xu, B.Zhao, M.Adeel and S.Zheng, *ACS Applied Polymer Materials*, 2019, **1**, 359-368.

## **Electronic Supplementary Information (ESI)**

### **Supplementary Movies**

Video S1. This video shows the synthesis of CSSE.

Video S2. This video shows the selective absorption of ether-water mixture by using methyl CSSE.

Video S3. This video shows CSSEs at a strain of 45% and after compressive test.
